# Supplementary material
Source: ML conference proceedings conference paper supplement (https://openaccess.thecvf.com/content/CVPR2021/html/Long_Radar-Camera_Pixel_Depth_CVPR_2021_paper.html)
Supplement: Supplementary file 1 [file Long_Radar-Camera_Pixel_Depth_CVPR_2021_supplemental.zip]

Archive with 3 entries (3 files):
- Supplementary.pdf
- Vid_1_Radar_Enhancement.mp4
- Vid_2_Lidar_Accum_Filtering.mp4
