# Supplementary material
Source: ML conference proceedings conference paper supplement (https://openaccess.thecvf.com/content/CVPR2021/html/Long_Radar-Camera_Pixel_Depth_CVPR_2021_paper.html)
Supplement: Supplementary file 1 [file Long_Radar-Camera_Pixel_Depth_CVPR_2021_supplemental.zip › Supplementary.pdf]

# Radar-Camera Pixel Depth Association for Depth Completion

## – Supplementary Material –

### Abstract

*In this supplementary material, we show the details of the U-Net we use in our experiment. As ablation studies, we investigate how neighborhood size and PDA thresholds influence depth estimation performance. We also provide visualization of MER for three samples.*

## 1. Network Details

Fig. 1 shows a typical structure of U-Net [2] we use for both Stages 1 and architecture [1] for Stage 2. It has five levels of resolutions where downsampling and upsampling are achieved by max-pooling and nearest neighbor interpolation. Except the input and output, all tensors in the network have the same number of channels  $N_c$ . All convolutions use  $3 \times 3$  filters.  $B_0$  represents the input block, a convolution layer that increases the number of channels to  $N_c$ .  $B_1$  denotes residual blocks connected in series and  $B_2$  is a sequence of convolutional blocks where each block consists of batch normalization, ReLU and convolution.  $B_3$  is the output block which includes batch normalization, ReLU and a convolutional layer changing the number of channels from  $N_c$  to that of output channels.

In our experiment, for Stage 1 network, we set  $N_c$  to 80. There are two residual blocks in  $B_1$  and four convolutional blocks in  $B_2$ , respectively. For Stage 2 network,  $N_c$  is set to 64.  $B_1$  has four residual blocks and  $B_2$  has 8 convolutional blocks. We use RMSProp as optimizer with a learning rate of  $5 \times 10^{-5}$ .

**Inference time** When we use Intel Core i7-8700 CPUs and an NVIDIA GeForce RTX 2080 Ti GPU, the inference times of Network 1 and Network 2 are 4.5 ms and 8.2 ms per frame, respectively.

## 2. Ablation Studies

### 2.1. Neighborhood Sizes

The neighborhood is a rectangular region around a radar pixel, which is defined as the neighborhood center. A neighborhood is designed to let the radar pixel have more space to

| Neighborhood  | MAE          | Abs Rel      | RMSE         | RMSE log     |
|---------------|--------------|--------------|--------------|--------------|
| (2, 2, 30, 5) | <b>1.487</b> | <b>0.085</b> | <b>3.210</b> | <b>0.145</b> |
| (3, 3, 20, 5) | 1.497        | 0.086        | <b>3.210</b> | 0.146        |
| (1, 1, 8, 1)  | 1.536        | 0.088        | 3.274        | 0.148        |

Table 1: Full-image depth estimation/completion errors (m).

| PDA Thresholds           | MAE          | Abs Rel      | RMSE         | RMSE log     |
|--------------------------|--------------|--------------|--------------|--------------|
| (0.6 : 0.1 : 0.9, 0.95)  | 1.487        | 0.085        | 3.210        | 0.145        |
| (0.5 : 0.1 : 0.9, 0.95)  | <b>1.472</b> | 0.085        | <b>3.179</b> | <b>0.144</b> |
| (0.6 : 0.05 : 0.9, 0.95) | 1.494        | <b>0.084</b> | 3.229        | 0.146        |

Table 2: Full-image depth estimation/completion errors with MER created by different thresholds (m). In the first column, “ $a:s:b$ ” indicates a set of thresholds  $a, a + s, a + 2s, \dots, b$ .

expand upwards, and thus, typically, the neighborhood center does not correspond to the geometric center. As shown in Fig. 2, we use  $(w_1, w_2, h_1, h_2)$  to represent the shape of a neighborhood, where  $w_1$  and  $w_2$  are the number of horizontal neighboring pixels to the left and right of the neighborhood center and  $h_3$  and  $h_4$  denote the number of vertical neighboring pixels above and below the center.

As shown in Table 1, we test different neighborhood sizes for Stage 1 network and compute their resultant depth error after using them in Stage 2 network [1]. The  $T_l$  to create MER in Stage 2 are (0.6, 0.7, 0.8, 0.9, 0.95).

### 2.2. PDA Thresholds for MER

MER can be generated with different PDA threshold  $T_l$  where  $l = 1, 2, \dots, N_c$ . With fixed neighborhood size (2, 2, 30, 5), we test different PDA thresholds and compute their resultant depth error. Results are shown in Table 2.

## 3. Visualization of MER

Fig. 3 shows MER created by PDA thresholds of 0.6, 0.7, 0.8, 0.9 and 0.95, respectively. We can see the expanded region decreases as PDA threshold increases.

## References

- [1] Fangchang Ma and Sertac Karaman. Sparse-to-dense: Depth prediction from sparse depth samples and a single image. In *IEEE International Conference on Robotics and Automation*, pages 4796–4803, 2018. 1
- [2] Olaf Ronneberger, Philipp Fischer, and Thomas Brox. U-Net: Convolutional networks for biomedical image segmen-

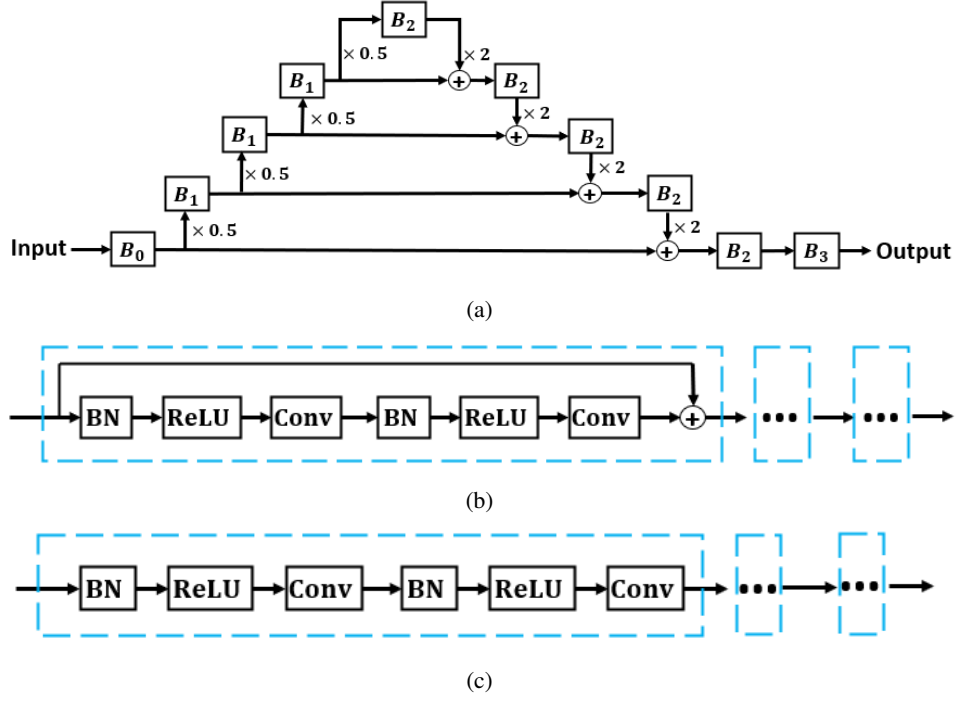

Figure 1: (a) U-Net used in our experiment. (b) Diagram of Block  $B_1$ , a series of residual blocks (shown as blue boxes). (c) Diagram of block  $B_2$ , a sequence of convolutional blocks (shown as blue box).  $BN$  and  $Conv$  denote batch normalization and a convolutional layer, respectively.

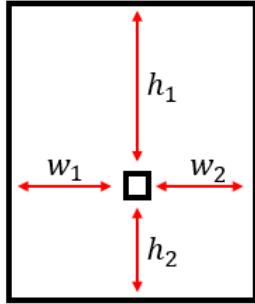

Figure 2: A neighborhood with shape  $(w_1, w_2, h_1, h_2)$ . The small square represents a radar pixel.

tation. In *International Conference on Medical Image Computing and Computer Assisted Intervention*, pages 234–241, 2015. 1

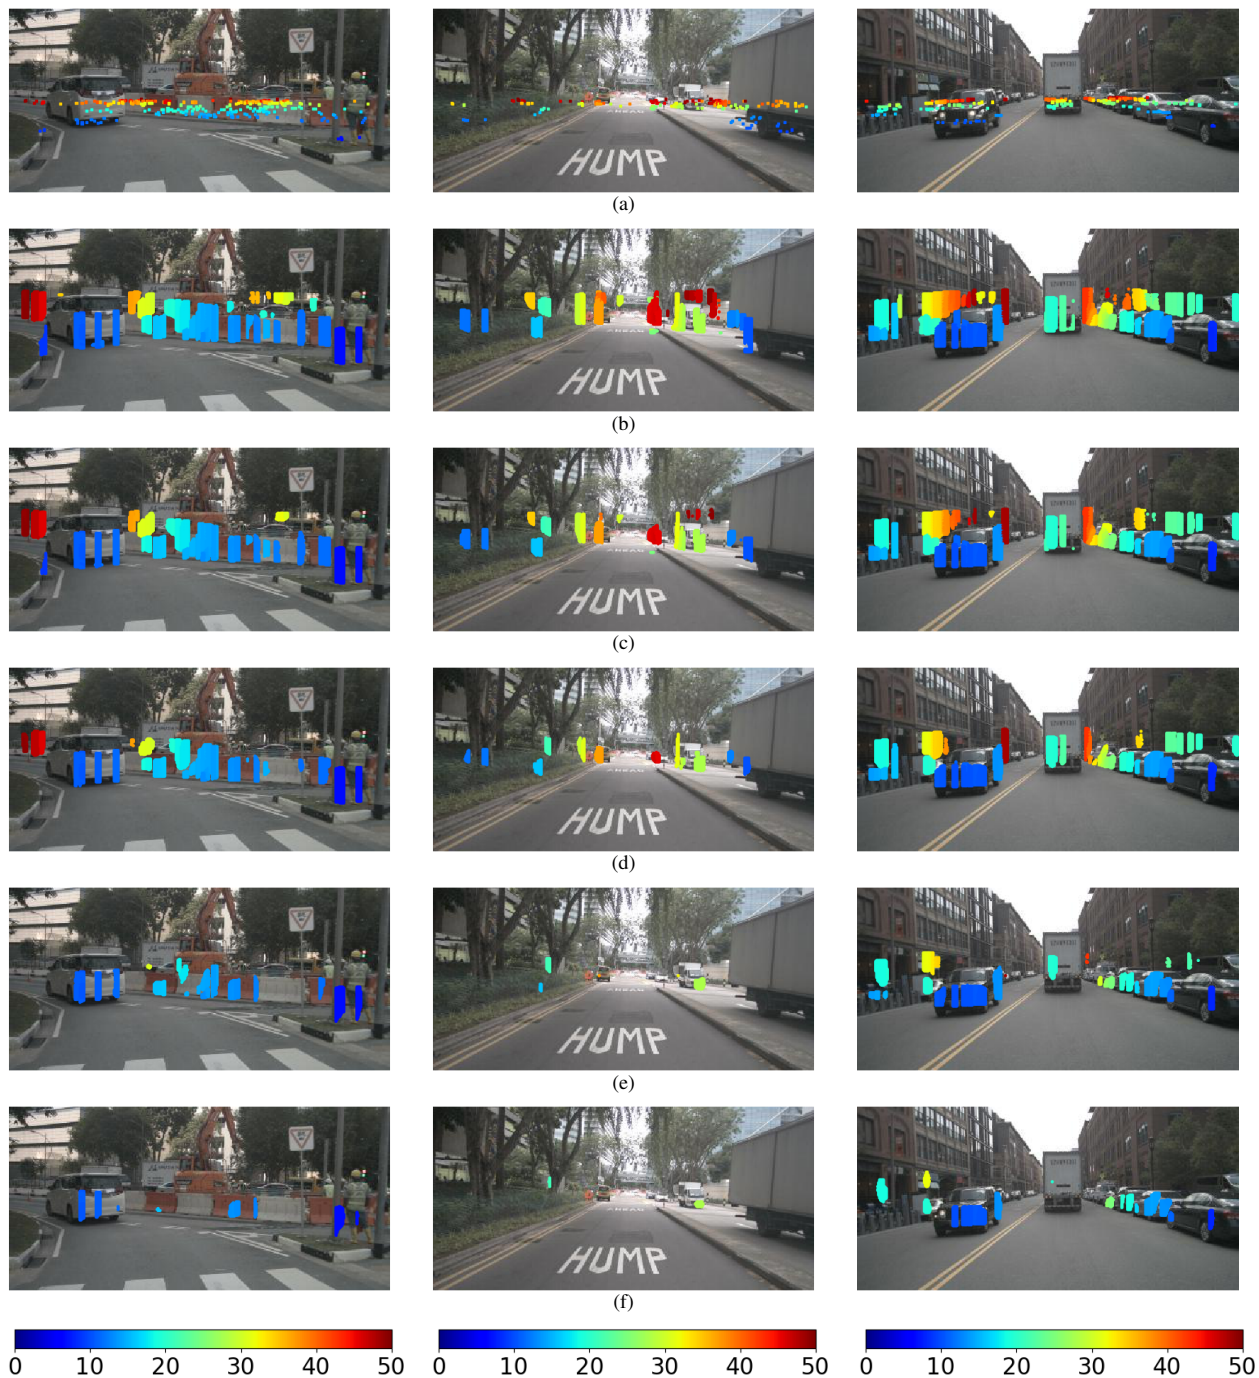

Figure 3: (a) Raw radar depth. MER with PDA thresholds (b) 0.6, (c) 0.7, (d) 0.8, (e) 0.9 and (f) 0.95. Occluded radar points are filtered out and corrected depth are expanded in MER.
